# Supplementary material
Source: publisher site journal article supplement (https://www.spandidos-publications.com/6287/downloadSupplementary)

Figure S1. Abnormal expression of p-STAT 3 and p-JAK was present in KYSE30 cells. The expression levels of p-STAT 3 and p-JAK in KYSE30, KYSE520, KYSE140, KYSE40 and HEEC were determined by western blotting experiments. \* $P < 0.05$ , \*\*\* $P < 0.0001$ ; ns, not significant ( $P > 0.05$ ). JAK, Janus kinase; STAT 3, signal transducer and activator 3; p, phosphorylated.

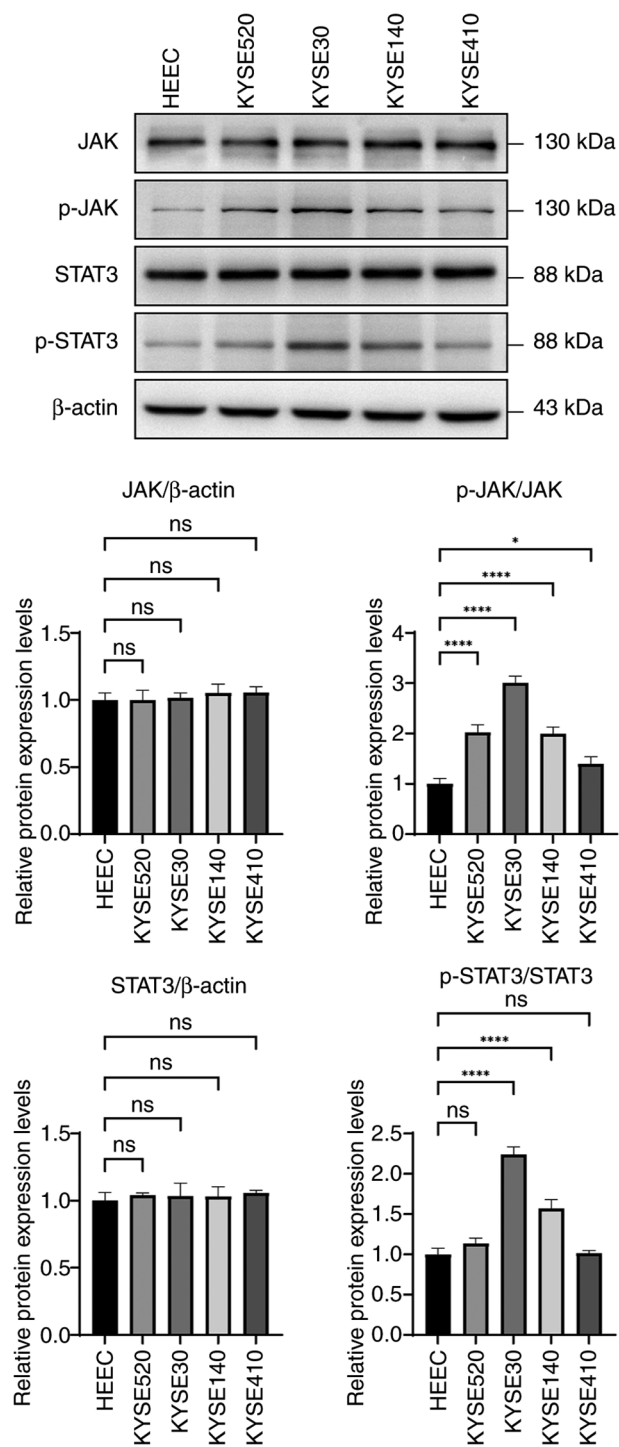

Supplement: Supplementary file 1 [file downloadSupplementary]
